# Supplementary material for: A Comparative Study on the Debittering of Kinnow (Citrus reticulate L.) Peels: Microbial, Chemical, and Ultrasound-Assisted Microbial Treatment
Source: MDPI journal article supplement (doi:10.3390/fermentation8080389), 2022-08-14
Supplement: s1 [file s1]

**Table S1.** Box-behnken design for ultrasound-assisted microbial debittering of kinnow peels.

| Run | Actual Values (Coded Values) |                     |                                                 |
|-----|------------------------------|---------------------|-------------------------------------------------|
|     | Temperature (°C)<br>$X_1$    | Time (Min)<br>$X_2$ | <i>Aspergillus niger</i> Koji Extract (%) $X_3$ |
| 1   | 50 (0)                       | 30 (-1)             | 3 (+1)                                          |
| 2   | 40 (-1)                      | 60 (0)              | 3 (+1)                                          |
| 3   | 50 (0)                       | 90 (+1)             | 1 (-1)                                          |
| 4   | 60 (+1)                      | 60 (0)              | 1 (-1)                                          |
| 5   | 50 (0)                       | 30 (-1)             | 1 (-1)                                          |
| 6   | 40 (-1)                      | 60 (0)              | 1 (-1)                                          |
| 7   | 50 (0)                       | 60 (0)              | 2 (0)                                           |
| 8   | 50 (0)                       | 60 (0)              | 2 (0)                                           |
| 9   | 40 (-1)                      | 90 (+1)             | 2 (0)                                           |
| 10  | 50 (0)                       | 60 (0)              | 2 (0)                                           |
| 11  | 40 (-1)                      | 30 (-1)             | 2 (0)                                           |
| 12  | 50 (0)                       | 60 (0)              | 2 (0)                                           |
| 13  | 50 (0)                       | 60 (0)              | 2 (0)                                           |
| 14  | 60 (+1)                      | 30 (-1)             | 2 (0)                                           |
| 15  | 50 (0)                       | 90 (+1)             | 3 (+1)                                          |
| 16  | 60 (+1)                      | 60 (0)              | 3 (+1)                                          |
| 17  | 60 (+1)                      | 90 (+1)             | 2 (0)                                           |
